# Supplementary material for: Bronchoalveolar Lavage Cell Count and Lymphocytosis Are the Important Discriminators between Fibrotic Hypersensitivity Pneumonitis and Idiopathic Pulmonary Fibrosis
Source: MDPI journal article supplement (doi:10.3390/diagnostics13050935), 2023-03-01
Supplement: s1 [file s1]

Table S1. Clinical predictors of fibrotic hypersensitivity pneumonitis vs. idiopathic pulmonary fibrosis diagnosis (multivariable logistic regression analysis <sup>#</sup> further adjusted for estimated pack-years).

| Characteristics                      | OR    | 95% CI       | P-value |
|--------------------------------------|-------|--------------|---------|
| <b>Male</b>                          | 1.11  | 0.42 – 2.96  | 0.828   |
| <b>Age at diagnosis</b>              | 0.91  | 0.86 – 0.95  | <0.001  |
| <b>Ever smoker</b>                   | 0.28  | 0.08 – 0.99  | 0.048   |
| <b>Identified exposure</b>           | 18.22 | 5.97 – 55.63 | <0.001  |
| <b>FVC, % predicted</b>              | 0.99  | 0.97 – 1.02  | 0.491   |
| <b>FEV<sub>1</sub>, %predicted</b>   | 0.97  | 0.94 – 0.99  | 0.020   |
| <b>FEV<sub>1</sub>/FVC</b>           | 0.97  | 0.93 – 1.02  | 0.235   |
| <b>TLC, %predicted</b>               | 0.99  | 0.96 – 1.02  | 0.562   |
| <b>TLco, %predicted</b>              | 0.97  | 0.95 – 1.00  | 0.077   |
| <b>6MWD, m</b>                       | 1.00  | 1.00 – 1.01  | 0.628   |
| <b>Desaturation during 6MWT, %</b>   | 1.04  | 0.97 – 1.12  | 0.254   |
| <b>Total cell count in BALF</b>      | 1.04  | 1.00 – 1.08  | 0.036   |
| <b>Neutrophils in BALF</b>           | 1.03  | 0.97 – 1.10  | 0.329   |
| <b>Eosinophils in BALF</b>           | 0.99  | 0.89 – 1.11  | 0.875   |
| <b>Lymphocytes in BALF</b>           | 1.15  | 1.08 – 1.22  | <0.001  |
| <b>Lymphocytosis in BALF &gt;20%</b> | 25.25 | 7.30 – 87.28 | <0.001  |

<sup>#</sup> Adjusted for a priori age, sex and smoking history

BALF: bronchoalveolar lavage fluid; FVC: forced vital capacity, FEV<sub>1</sub>: forced expiratory volume in one second, FEV<sub>1</sub>/FVC: forced expiratory volume in one second to forced vital capacity ratio; TLC: total lung capacity, TL<sub>co</sub>: transfer factor of the lungs for carbon monoxide; 6MWD: 6-min Walk Distance; 6MWT: 6-min Walk Test
